# Supplementary material
Source: PubMed Central journal article supplement (PMC8459304)
Supplement: jamapsychiatry-e212588-s001.pdf [file jamapsychiatry-e212588-s001.pdf]

## Supplementary Online Content

Han B, Compton WM, Jones CM, Einstein EB, Volkow ND. Methamphetamine use, methamphetamine use disorder, and associated overdose deaths among US adults. *JAMA Psychiatry*. Published online September 22, 2020. doi:10.1001/jamapsychiatry.2021.2588

**eTable.** Bivariable Multinomial Logistic Regression Results Show Correlates of Past-Year Methamphetamine Use, Use Disorder, and Injection Among Adults Aged 18-64 in the U.S. (N=195,711)

This supplementary material has been provided by the authors to give readers additional information about their work.

**eTable.** Bivariable Multinomial Logistic Regression Results Show Correlates of Past-Year Methamphetamine Use, Use Disorder, and Injection Among Adults Aged 18-64 in the U.S. (N=195,711)

| Correlates                        | Methamphetamine use, but no use disorder, no injection vs. no use<br>Risk Ratio (95% CI)<br>n=194,554 | Methamphetamine use disorder, but no injection vs. no use<br>Risk Ratio (95% CI)<br>n=194,465 | Methamphetamine injection (regardless of use disorder) vs. no use<br>Risk Ratio (95% CI)<br>n=194,240 |
|-----------------------------------|-------------------------------------------------------------------------------------------------------|-----------------------------------------------------------------------------------------------|-------------------------------------------------------------------------------------------------------|
| <b>Year</b>                       |                                                                                                       |                                                                                               |                                                                                                       |
| 2015                              | 0.95 (0.73-1.22)                                                                                      | <b>0.68 (0.46-0.99)</b>                                                                       | 0.89 (0.61-1.30)                                                                                      |
| 2016                              | 0.76 (0.57-1.01)                                                                                      | <b>0.49 (0.35-0.68)</b>                                                                       | 1.07 (0.67-1.69)                                                                                      |
| 2017                              | <b>0.71 (0.52-0.95)</b>                                                                               | 0.79 (0.55-1.15)                                                                              | 1.29 (0.92-1.81)                                                                                      |
| 2018                              | 0.89 (0.63-1.26)                                                                                      | 0.90 (0.70-1.15)                                                                              | 1.16 (0.74-1.81)                                                                                      |
| 2019 (ref)                        | 1.0                                                                                                   | 1.0                                                                                           | 1.0                                                                                                   |
| <b>Age</b>                        |                                                                                                       |                                                                                               |                                                                                                       |
| 18-23 (ref)                       | 1.0                                                                                                   | 1.0                                                                                           | 1.0                                                                                                   |
| 24-34                             | 0.93 (0.74-1.17)                                                                                      | <b>1.49 (1.15-1.93)</b>                                                                       | <b>2.58 (1.86-3.58)</b>                                                                               |
| 35-49                             | <b>0.75 (0.59-0.95)</b>                                                                               | 1.16 (0.86-1.56)                                                                              | <b>1.91 (1.33-2.76)</b>                                                                               |
| 50-64                             | <b>0.57 (0.43-0.78)</b>                                                                               | <b>0.59 (0.40-0.88)</b>                                                                       | 1.05 (0.67-1.63)                                                                                      |
| <b>Sex and Sexual Orientation</b> |                                                                                                       |                                                                                               |                                                                                                       |
| Gay men                           | <b>5.47 (3.02-9.92)</b>                                                                               | <b>4.72 (2.34-9.54)</b>                                                                       | <b>11.64 (6.47-20.95)</b>                                                                             |
| Lesbian women                     | 1.60 (0.70-3.68)                                                                                      | 1.49 (0.64-3.44)                                                                              | 1.12 (0.47-2.65)                                                                                      |
| Bisexual men                      | <b>4.74 (2.31-9.71)</b>                                                                               | <b>5.37 (2.88-10.00)</b>                                                                      | <b>3.46 (1.38-8.67)</b>                                                                               |
| Bisexual women                    | <b>3.10 (2.06-4.66)</b>                                                                               | <b>4.30 (3.03-6.11)</b>                                                                       | <b>7.95 (4.97-12.69)</b>                                                                              |
| Men, unknown orientation          | 1.06 (0.41-2.75)                                                                                      | <b>4.67 (2.03-10.74)</b>                                                                      | 3.08 (0.86-11.01)                                                                                     |
| Women, unknown orientation        | 1.20 (0.54-2.65)                                                                                      | 0.68 (0.17-2.67)                                                                              | 0.37 (0.09-1.54)                                                                                      |
| Heterosexual men                  | <b>1.70 (1.32-2.20)</b>                                                                               | <b>1.94 (1.54-2.44)</b>                                                                       | <b>2.41 (1.82-3.19)</b>                                                                               |
| Heterosexual women (ref)          | 1.0                                                                                                   | 1.0                                                                                           | 1.0                                                                                                   |
| <b>Race/Ethnicity</b>             |                                                                                                       |                                                                                               |                                                                                                       |
| NH white                          | <b>2.93 (1.80-4.75)</b>                                                                               | <b>3.11 (1.85-5.25)</b>                                                                       | <b>5.64 (3.71-8.59)</b>                                                                               |
| NH Black (ref)                    | 1.0                                                                                                   | 1.0                                                                                           | 1.0                                                                                                   |
| NH AIAN                           | <b>5.83 (3.07-11.04)</b>                                                                              | <b>14.71 (5.96-36.27)</b>                                                                     | <b>14.32 (8.17-25.09)</b>                                                                             |
| NH NHOPI                          | 1.79 (0.56-5.75)                                                                                      | <b>6.22 (2.17-17.80)</b>                                                                      | <b>9.57 (2.57-35.55)</b>                                                                              |
| NH Asian                          | <b>0.42 (0.18-0.96)</b>                                                                               | 0.62 (0.19-2.01)                                                                              | 0.40 (0.06-2.74)                                                                                      |
| NH more than one race             | <b>2.83 (1.45-5.52)</b>                                                                               | <b>5.23 (2.45-11.14)</b>                                                                      | <b>8.14 (3.77-17.53)</b>                                                                              |
| Hispanic                          | <b>1.65 (1.01-2.69)</b>                                                                               | <b>3.42 (1.82-6.41)</b>                                                                       | <b>2.45 (1.44-4.17)</b>                                                                               |
| <b>Education</b>                  |                                                                                                       |                                                                                               |                                                                                                       |
| < High school education           | <b>4.19 (2.87-6.11)</b>                                                                               | <b>9.96 (5.97-16.61)</b>                                                                      | <b>10.40 (5.63-19.22)</b>                                                                             |
| High school education             | <b>3.41 (2.28-5.11)</b>                                                                               | <b>7.71 (4.69-12.67)</b>                                                                      | <b>9.47 (5.13-17.47)</b>                                                                              |
| Some college                      | <b>2.47 (1.68-3.61)</b>                                                                               | <b>5.32 (3.30-8.56)</b>                                                                       | <b>6.26 (3.38-11.60)</b>                                                                              |
| ≥College (ref)                    | 1.0                                                                                                   | 1.0                                                                                           | 1.0                                                                                                   |
| <b>Family Income</b>              |                                                                                                       |                                                                                               |                                                                                                       |
| <\$20,000                         | <b>4.23 (3.09-5.80)</b>                                                                               | <b>7.43 (5.42-10.19)</b>                                                                      | <b>7.63 (5.17-11.27)</b>                                                                              |
| \$20,000-\$49,999                 | <b>2.56 (1.97-3.32)</b>                                                                               | <b>4.16 (3.01-5.75)</b>                                                                       | <b>3.34 (2.25-4.97)</b>                                                                               |
| \$50,000-\$74,999                 | <b>1.45 (1.03-2.05)</b>                                                                               | <b>2.48 (1.63-3.76)</b>                                                                       | <b>1.99 (1.02-3.89)</b>                                                                               |
| \$75,000 (ref)                    | 1.0                                                                                                   | 1.0                                                                                           | 1.0                                                                                                   |
| <b>Employment Status</b>          |                                                                                                       |                                                                                               |                                                                                                       |
| Full-time employment (ref)        | 1.0                                                                                                   | 1.0                                                                                           | 1.0                                                                                                   |
| Part-time employment              | 1.24 (0.91-1.68)                                                                                      | 1.39 (0.92-2.09)                                                                              | 1.16 (0.74-1.82)                                                                                      |
| Unemployment                      | <b>3.39 (2.59-4.44)</b>                                                                               | <b>4.22 (3.16-5.62)</b>                                                                       | <b>5.60 (4.19-7.48)</b>                                                                               |
| Other                             | <b>2.09 (1.62-2.69)</b>                                                                               | <b>2.41 (1.76-3.29)</b>                                                                       | <b>2.40 (1.70-3.40)</b>                                                                               |
| <b>Health Insurance</b>           |                                                                                                       |                                                                                               |                                                                                                       |
| Private-only (ref)                | 1.0                                                                                                   | 1.0                                                                                           | 1.0                                                                                                   |
| Uninsured                         | <b>3.47 (2.62-4.59)</b>                                                                               | <b>6.24 (4.61-8.45)</b>                                                                       | <b>7.49 (4.75-11.81)</b>                                                                              |
| Medicaid only                     | <b>4.25 (3.34-5.41)</b>                                                                               | <b>8.44 (6.20-11.48)</b>                                                                      | <b>8.84 (6.21-12.58)</b>                                                                              |
| Other                             | <b>2.91 (2.13-3.98)</b>                                                                               | <b>3.18 (2.12-4.78)</b>                                                                       | <b>3.77 (2.40-5.94)</b>                                                                               |
| <b>Marital Status</b>             |                                                                                                       |                                                                                               |                                                                                                       |
| Married (ref)                     | 1.0                                                                                                   | 1.0                                                                                           | 1.0                                                                                                   |
| Widowed                           | <b>2.27 (1.13-4.56)</b>                                                                               | <b>3.41 (1.77-6.57)</b>                                                                       | <b>5.53 (2.34-13.68)</b>                                                                              |
| Divorced/separated                | <b>5.16 (3.78-7.03)</b>                                                                               | <b>5.29 (3.74-7.49)</b>                                                                       | <b>7.86 (5.24-11.78)</b>                                                                              |
| Never married                     | <b>3.31 (2.68-4.08)</b>                                                                               | <b>4.51 (3.64-5.58)</b>                                                                       | <b>4.38 (3.03-6.34)</b>                                                                               |

| Correlates                     | Methamphetamine use, but no use disorder, no injection vs. no use<br>Risk Ratio (95% CI)<br>n=194,554 | Methamphetamine use disorder, but no injection vs. no use<br>Risk Ratio (95% CI)<br>n=194,465 | Methamphetamine injection (regardless of use disorder) vs. no use<br>Risk Ratio (95% CI)<br>n=194,240 |
|--------------------------------|-------------------------------------------------------------------------------------------------------|-----------------------------------------------------------------------------------------------|-------------------------------------------------------------------------------------------------------|
| No. of Times Moved, PY         |                                                                                                       |                                                                                               |                                                                                                       |
| 0 (ref)                        | 1.0                                                                                                   | 1.0                                                                                           | 1.0                                                                                                   |
| 1                              | <b>1.88 (1.40-2.50)</b>                                                                               | <b>1.64 (1.28-2.11)</b>                                                                       | <b>2.57 (1.69-3.93)</b>                                                                               |
| 2                              | <b>2.07 (1.41-3.03)</b>                                                                               | <b>3.43 (2.70-4.35)</b>                                                                       | <b>5.38 (3.69-7.84)</b>                                                                               |
| 3                              | <b>3.32 (2.50-4.43)</b>                                                                               | <b>6.19 (4.55-8.43)</b>                                                                       | <b>16.14 (11.95-21.81)</b>                                                                            |
| Metropolitan Status            |                                                                                                       |                                                                                               |                                                                                                       |
| Large metro (ref)              | 1.0                                                                                                   | 1.0                                                                                           | 1.0                                                                                                   |
| Small metro                    | <b>1.45 (1.13-1.86)</b>                                                                               | <b>1.32 (1.01-1.74)</b>                                                                       | <b>1.86 (1.33-2.60)</b>                                                                               |
| Nonmetro                       | <b>1.65 (1.30-2.10)</b>                                                                               | <b>1.72 (1.27-2.32)</b>                                                                       | <b>3.42 (2.46-4.74)</b>                                                                               |
| PY Probation/Parole            |                                                                                                       |                                                                                               |                                                                                                       |
| Yes                            | <b>6.58 (5.00-8.66)</b>                                                                               | <b>16.52 (13.38-20.41)</b>                                                                    | <b>23.11 (17.50-30.53)</b>                                                                            |
| No (ref)                       | 1.0                                                                                                   | 1.0                                                                                           | 1.0                                                                                                   |
| Hypertension                   |                                                                                                       |                                                                                               |                                                                                                       |
| Yes                            | 0.87 (0.58-1.28)                                                                                      | 1.27 (0.87-2.58)                                                                              | 0.80 (0.52-1.22)                                                                                      |
| No (ref)                       | 1.0                                                                                                   | 1.0                                                                                           | 1.0                                                                                                   |
| Heart Disease                  |                                                                                                       |                                                                                               |                                                                                                       |
| Yes                            | 1.38 (0.96-1.97)                                                                                      | 1.29 (0.82-2.02)                                                                              | <b>1.74 (1.10-2.75)</b>                                                                               |
| No (ref)                       | 1.0                                                                                                   | 1.0                                                                                           | 1.0                                                                                                   |
| Diabetes Mellitus              |                                                                                                       |                                                                                               |                                                                                                       |
| Yes                            | 0.83 (0.55-1.26)                                                                                      | 0.93 (0.58-1.49)                                                                              | <b>0.53 (0.33-0.86)</b>                                                                               |
| No (ref)                       | 1.0                                                                                                   | 1.0                                                                                           | 1.0                                                                                                   |
| COPD                           |                                                                                                       |                                                                                               |                                                                                                       |
| Yes                            | <b>4.03 (2.79-5.82)</b>                                                                               | <b>3.75 (2.72-5.17)</b>                                                                       | <b>3.88 (2.12-7.11)</b>                                                                               |
| No (ref)                       | 1.0                                                                                                   | 1.0                                                                                           | 1.0                                                                                                   |
| Cancer                         |                                                                                                       |                                                                                               |                                                                                                       |
| Yes                            | 1.14 (0.58-2.24)                                                                                      | 1.43 (0.81-2.51)                                                                              | 1.23 (0.66-2.29)                                                                                      |
| No (ref)                       | 1.0                                                                                                   | 1.0                                                                                           | 1.0                                                                                                   |
| Asthma                         |                                                                                                       |                                                                                               |                                                                                                       |
| Yes                            | <b>1.37 (1.01-1.85)</b>                                                                               | <b>1.38 (1.00-1.89)</b>                                                                       | 1.06 (0.68-1.66)                                                                                      |
| No (ref)                       | 1.0                                                                                                   | 1.0                                                                                           | 1.0                                                                                                   |
| HIV/AIDS                       |                                                                                                       |                                                                                               |                                                                                                       |
| Yes                            | <b>5.71 (1.74-18.68)</b>                                                                              | <b>12.52 (6.09-25.75)</b>                                                                     | <b>17.64 (8.22-37.84)</b>                                                                             |
| No (ref)                       | 1.0                                                                                                   | 1.0                                                                                           | 1.0                                                                                                   |
| Hepatitis B or C               |                                                                                                       |                                                                                               |                                                                                                       |
| Yes                            | <b>6.71 (4.06-11.08)</b>                                                                              | <b>4.56 (2.56-8.11)</b>                                                                       | <b>26.95 (20.23-35.91)</b>                                                                            |
| No (ref)                       | 1.0                                                                                                   | 1.0                                                                                           | 1.0                                                                                                   |
| Past-year STI                  |                                                                                                       |                                                                                               |                                                                                                       |
| Yes                            | <b>3.56 (2.49-5.08)</b>                                                                               | <b>4.00 (2.72-5.88)</b>                                                                       | <b>4.99 (3.30-7.55)</b>                                                                               |
| No (ref)                       | 1.0                                                                                                   | 1.0                                                                                           | 1.0                                                                                                   |
| PY Major Depressive Episode    |                                                                                                       |                                                                                               |                                                                                                       |
| Yes                            | <b>2.42 (1.86-3.15)</b>                                                                               | <b>4.91 (4.08-5.92)</b>                                                                       | <b>4.90 (3.62-6.64)</b>                                                                               |
| Did not answer                 | <b>3.00 (1.71-5.27)</b>                                                                               | <b>3.25 (1.67-6.32)</b>                                                                       | <b>4.04 (2.10-7.77)</b>                                                                               |
| No (ref)                       | 1.0                                                                                                   | 1.0                                                                                           | 1.0                                                                                                   |
| PY Serious Thoughts of Suicide |                                                                                                       |                                                                                               |                                                                                                       |
| Yes                            | <b>4.11 (3.07-5.50)</b>                                                                               | <b>6.32 (4.74-8.42)</b>                                                                       | <b>7.75 (5.48-10.95)</b>                                                                              |
| Did not answer                 | <b>4.13 (2.26-7.52)</b>                                                                               | <b>4.69 (2.26-9.70)</b>                                                                       | <b>2.63 (1.45-4.77)</b>                                                                               |
| No (ref)                       | 1.0                                                                                                   | 1.0                                                                                           | 1.0                                                                                                   |
| PY Suicide Plan                |                                                                                                       |                                                                                               |                                                                                                       |
| Yes                            | <b>5.03 (3.44-7.35)</b>                                                                               | <b>7.71 (5.62-10.58)</b>                                                                      | <b>9.78 (6.64-14.41)</b>                                                                              |
| Did not answer                 | <b>3.76 (2.09-6.78)</b>                                                                               | <b>4.00 (1.93-8.29)</b>                                                                       | <b>2.30 (1.32-4.01)</b>                                                                               |
| No (ref)                       | 1.0                                                                                                   | 1.0                                                                                           | 1.0                                                                                                   |
| PY Suicide Attempt             |                                                                                                       |                                                                                               |                                                                                                       |
| Yes                            | <b>6.33 (4.27-9.38)</b>                                                                               | <b>6.79 (4.72-9.77)</b>                                                                       | <b>13.03 (8.51-19.95)</b>                                                                             |
| Did not answer                 | <b>3.66 (2.02-6.64)</b>                                                                               | <b>3.81 (1.85-7.84)</b>                                                                       | <b>2.22 (1.19-4.13)</b>                                                                               |
| No (ref)                       | 1.0                                                                                                   | 1.0                                                                                           | 1.0                                                                                                   |

| Correlates                                                | Methamphetamine use, but no use disorder, no injection vs. no use<br>Risk Ratio (95% CI)<br>n=194,554 | Methamphetamine use disorder, but no injection vs. no use<br>Risk Ratio (95% CI)<br>n=194,465 | Methamphetamine injection (regardless of use disorder) vs. no use<br>Risk Ratio (95% CI)<br>n=194,240 |
|-----------------------------------------------------------|-------------------------------------------------------------------------------------------------------|-----------------------------------------------------------------------------------------------|-------------------------------------------------------------------------------------------------------|
| Past-Month Nicotine Dependence                            |                                                                                                       |                                                                                               |                                                                                                       |
| Yes                                                       | <b>6.67 (5.53-8.03)</b>                                                                               | <b>8.98 (6.95-11.59)</b>                                                                      | <b>8.01 (13.03-24.89)</b>                                                                             |
| No (ref)                                                  | 1.0                                                                                                   | 1.0                                                                                           | 1.0                                                                                                   |
| PY Alcohol Use Disorder                                   |                                                                                                       |                                                                                               |                                                                                                       |
| Yes                                                       | <b>4.30 (3.36-5.50)</b>                                                                               | <b>5.44 (4.37-6.77)</b>                                                                       | <b>3.83 (2.66-5.51)</b>                                                                               |
| No (ref)                                                  | 1.0                                                                                                   | 1.0                                                                                           | 1.0                                                                                                   |
| PY Cannabis Use Disorder or Use Cannabis Daily/Near Daily |                                                                                                       |                                                                                               |                                                                                                       |
| Yes                                                       | <b>12.91 (10.13-16.47)</b>                                                                            | <b>15.41 (11.35-20.92)</b>                                                                    | <b>14.88 (10.43-21.23)</b>                                                                            |
| No, but PY use                                            | <b>7.68 (6.00-9.83)</b>                                                                               | <b>8.17 (5.67-11.75)</b>                                                                      | <b>20.59 (7.60-14.76)</b>                                                                             |
| No PY use (ref)                                           | 1.0                                                                                                   | 1.0                                                                                           | 1.0                                                                                                   |
| PY Cocaine Use                                            |                                                                                                       |                                                                                               |                                                                                                       |
| Yes                                                       | <b>18.32 (15.09-22.24)</b>                                                                            | <b>14.88 (12.21-18.14)</b>                                                                    | <b>19.21 (14.11-26.16)</b>                                                                            |
| No (ref)                                                  | 1.0                                                                                                   | 1.0                                                                                           | 1.0                                                                                                   |
| PY Hallucinogen Use                                       |                                                                                                       |                                                                                               |                                                                                                       |
| Yes                                                       | <b>12.02 (9.78-14.77)</b>                                                                             | <b>9.25 (7.49-11.42)</b>                                                                      | <b>14.31 (10.29-19.89)</b>                                                                            |
| No (ref)                                                  | 1.0                                                                                                   | 1.0                                                                                           | 1.0                                                                                                   |
| Past-Year Heroin Use or Rx. Opioid Misuse                 |                                                                                                       |                                                                                               |                                                                                                       |
| Yes                                                       | <b>10.73 (8.56-13.45)</b>                                                                             | <b>13.29 (10.72-16.47)</b>                                                                    | <b>46.01 (33.89-62.45)</b>                                                                            |
| No (ref)                                                  | 1.0                                                                                                   | 1.0                                                                                           | 1.0                                                                                                   |
| Past-Year Rx. Tranquilizer/Sedative Misuse                |                                                                                                       |                                                                                               |                                                                                                       |
| Yes                                                       | <b>9.87 (7.95-12.25)</b>                                                                              | <b>12.17 (9.58-15.45)</b>                                                                     | <b>20.52 (15.51-27.14)</b>                                                                            |
| No (ref)                                                  | 1.0                                                                                                   | 1.0                                                                                           | 1.0                                                                                                   |
| Past-Year Rx. Stimulant Misuse                            |                                                                                                       |                                                                                               |                                                                                                       |
| Yes                                                       | <b>9.64 (7.87-11.80)</b>                                                                              | <b>8.40 (6.56-10.76)</b>                                                                      | <b>17.56 (12.83-24.04)</b>                                                                            |
| No (ref)                                                  | 1.0                                                                                                   | 1.0                                                                                           | 1.0                                                                                                   |
| PY Cocaine Injection                                      |                                                                                                       |                                                                                               |                                                                                                       |
| Yes                                                       | *                                                                                                     | *                                                                                             | <b>279.80 (210.85-371.29)</b>                                                                         |
| No (ref)                                                  | 1.0                                                                                                   | 1.0                                                                                           | 1.0                                                                                                   |
| PY Heroin Injection                                       |                                                                                                       |                                                                                               |                                                                                                       |
| Yes                                                       | <b>17.35 (10.83-27.80)</b>                                                                            | <b>11.52 (5.64-23.52)</b>                                                                     | <b>272.04 (206.64-356.41)</b>                                                                         |
| No (ref)                                                  | 1.0                                                                                                   | 1.0                                                                                           | 1.0                                                                                                   |

Source: The 2015-2019 National Surveys on Drug Use and Health. CI=confidence interval; PY=past year; NH=Non-Hispanic; AIAN=American Indian or Alaska Native; NHOPI=Native Hawaiians/Other Pacific Islander; STI=sexually transmitted infection; Rx=prescription. Each **bolded** estimate is statistically significantly different from the estimate of the reference group within the same cell. \*: This estimate was suppressed due to low statistical precision.
